# Supplementary material
Source: publisher figshare collection journal article supplement (https://aacr.figshare.com/articles/dataset/_/23782426)

**Supplementary Figure S2- E2 induces DNA damage in LTED and ER-overexpressing cells.** In (A/B), cells were propagated in HD medium prior to seeding. In (C), T47D/pInd20-*ESR1* cells were pretreated with HD x 7 d, and then treated with HD + dox x 14 d prior to seeding. All cells were then treated as indicated x 24 h. Cells were fixed and stained for 53BP1 (green) and with DAPI (blue). Representative images are shown in (A). 53BP1 foci were counted in  $\geq 100$  cells per group. \* $p < 0.05$ , \*\*\* $p < 0.0005$ , \*\*\*\* $p < 0.0001$ .

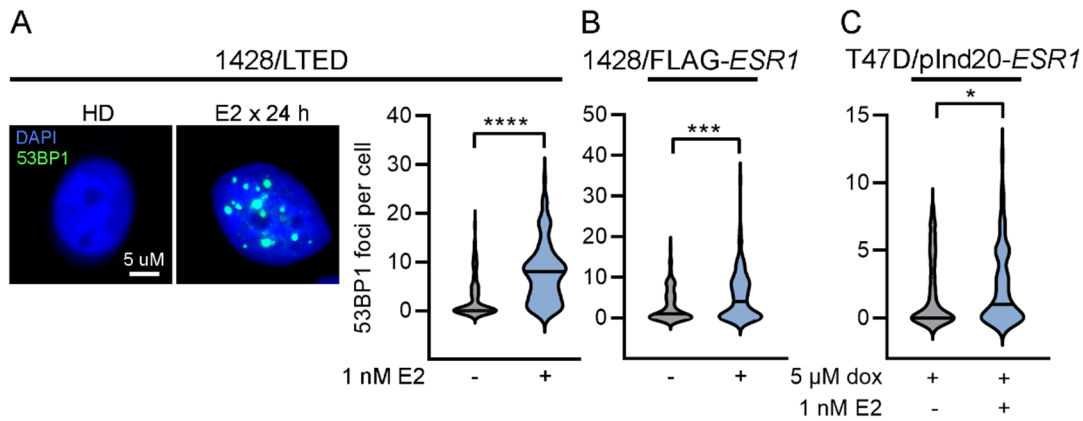

Supplement: Supplementary file 1 [file 41716003]
